# Supplementary material
Source: PubMed Central journal article supplement (PMC4275375)
Supplement: NIHMS626123-supplement-supplement_1.pdf [file NIHMS626123-supplement-supplement_1.pdf]

**Supplementary Table 1. Hazard Ratios Stratified by Baseline Subject and Tumor Characteristics**

|                                             |              | Leptin (ng/mL)    |                 |                   | Adiponectin (ng/mL) |             |                   | HOMA-IR          |             |                   |
|---------------------------------------------|--------------|-------------------|-----------------|-------------------|---------------------|-------------|-------------------|------------------|-------------|-------------------|
| Variable                                    |              | ≥7.9 vs. <7.9     | P-value         | P for Interaction | ≥13050 vs. <13050   | P-value     | P for Interaction | ≥3.2 vs. <3.2    | P-value     | P for Interaction |
| <b>Age</b>                                  |              |                   |                 | 0.50              |                     |             | 0.52              |                  |             | 0.14              |
|                                             | ≥ 62.0       | 0.51 (0.23-1.15)  | 0.10            |                   | 2.24 (0.93-5.37)    | 0.07        |                   | 0.47 (0.20-1.12) | 0.09        |                   |
|                                             | < 62.0       | 0.74 (0.34-1.59)  | 0.44            |                   | 1.61 (0.76-3.49)    | 0.20        |                   | 1.16 (0.54-2.49) | 0.70        |                   |
| <b>Gender</b>                               |              |                   |                 | 0.56              |                     |             | 0.57              |                  |             | 0.72              |
|                                             | Male         | 0.66 (0.35-1.25)  | 0.20            |                   | 2.08 (1.11-3.90)    | <b>0.02</b> |                   | 0.72 (0.38-1.34) | 0.30        |                   |
|                                             | Female       | 0.45 (0.14-1.43)  | 0.18            |                   | 1.35 (0.36-5.01)    | 0.65        |                   | 0.95 (0.27-3.26) | 0.93        |                   |
| <b>Hepatitis B virus</b>                    |              |                   |                 | 0.13              |                     |             | 0.96              |                  |             | 0.26              |
|                                             | Positive     | 2.06 (0.40-10.47) | 0.38            |                   | 1.90 (0.34-10.57)   | 0.45        |                   | 1.82 (0.35-9.39) | 0.47        |                   |
|                                             | Negative     | 0.51 (0.28-0.92)  | <b>0.02</b>     |                   | 1.72 (0.94-3.13)    | 0.07        |                   | 0.66 (0.36-1.19) | 0.17        |                   |
| <b>Hepatitis C virus</b>                    |              |                   |                 | 0.20              |                     |             | 0.65              |                  |             | 0.43              |
|                                             | Positive     | 0.44 (0.20-0.93)  | <b>0.03</b>     |                   | 1.69 (0.79-3.57)    | 0.17        |                   | 0.65 (0.31-1.35) | 0.25        |                   |
|                                             | Negative     | 0.93 (0.38-2.30)  | 0.88            |                   | 2.05 (0.84-4.99)    | 0.11        |                   | 0.95 (0.39-2.32) | 0.92        |                   |
| <b>Diabetes mellitus</b>                    |              |                   |                 | 0.65              |                     |             | 0.85              |                  |             | 0.17              |
|                                             | Positive     | 0.31 (0.12-0.79)  | <b>0.01</b>     |                   | 3.24 (1.23-8.55)    | <b>0.01</b> |                   | 0.30 (0.12-0.75) | <b>0.01</b> |                   |
|                                             | Negative     | 0.55 (0.25-1.22)  | 0.14            |                   | 1.96 (0.91-4.19)    | 0.08        |                   | 0.80 (0.37-1.73) | 0.57        |                   |
| <b>Alcohol history</b>                      |              |                   |                 | 0.49              |                     |             | 0.19              |                  |             | 0.47              |
|                                             | Positive     | 0.40 (0.07-2.09)  | 0.27            |                   | 6.58 (0.79-54.78)   | 0.08        |                   | 0.48 (0.10-2.15) | 0.33        |                   |
|                                             | Negative     | 0.66 (0.36-1.19)  | 0.66            |                   | 1.59 (0.88-2.88)    | 0.11        |                   | 0.90 (0.49-1.64) | 0.74        |                   |
| <b>BMI at enrollment (Kg/m<sup>2</sup>)</b> |              |                   |                 | 0.01              |                     |             | 0.24              |                  |             | 0.03              |
|                                             | < 25         | 0.14 (0.02-1.12)  | 0.06            |                   | 2.68 (0.99-7.23)    | 0.05        |                   | 0.27 (0.06-1.18) | 0.08        |                   |
|                                             | 25-30        | 1.32 (0.55-3.14)  | 0.52            |                   | 1.68 (0.69-4.05)    | 0.24        |                   | 1.22 (0.50-2.96) | 0.65        |                   |
|                                             | ≥ 30         | 0.22 (0.06-0.81)  | <b>0.02</b>     |                   | 1.28 (0.42-3.87)    | 0.66        |                   | 1.25 (0.33-4.66) | 0.73        |                   |
| <b>Child-Pugh class</b>                     |              |                   |                 | 0.01              |                     |             | 0.95              |                  |             | 0.85              |
|                                             | A            | 0.92 (0.43-1.94)  | 0.83            |                   | 1.52 (0.72-3.22)    | 0.27        |                   | 0.77 (0.36-1.66) | 0.51        |                   |
|                                             | B            | 0.26 (0.10-0.61)  | <b>&lt;0.01</b> |                   | 1.39 (0.51-3.77)    | 0.51        |                   | 0.67 (0.29-1.53) | 0.67        |                   |
| <b>Within Milan criteria</b>                |              |                   |                 | 0.29              |                     |             | 0.70              |                  |             | 0.86              |
|                                             | Positive     | 1.52 (0.29-7.89)  | 0.61            |                   | 2.66 (0.51-13.79)   | 0.24        |                   | 0.81 (0.18-3.67) | 0.79        |                   |
|                                             | Negative     | 0.66 (0.36-1.20)  | 0.17            |                   | 1.94 (1.07-3.52)    | <b>0.02</b> |                   | 0.71 (0.39-1.30) | 0.27        |                   |
| <b>BCLC stage</b>                           |              |                   |                 | 0.54              |                     |             | 0.91              |                  |             | 0.62              |
|                                             | 0,A          | 0.56 (0.18-1.76)  | 0.32            |                   | 1.81 (0.57-5.74)    | 0.31        |                   | 0.73 (0.23-2.27) | 0.58        |                   |
|                                             | B,C          | 0.81 (0.43-1.54)  | 0.53            |                   | 1.74 (0.92-3.28)    | 0.08        |                   | 0.97 (0.51-1.85) | 0.94        |                   |
| <b>AFP</b>                                  |              |                   |                 | 0.40              |                     |             | 0.79              |                  |             | 0.40              |
|                                             | ≥ 47.9 ng/mL | 0.84 (0.41-1.71)  | 0.64            |                   | 1.72 (0.84-3.50)    | 0.13        |                   | 1.08 (0.53-2.19) | 0.82        |                   |
|                                             | < 47.9 ng/mL | 0.53 (0.22-1.29)  | 0.16            |                   | 1.90 (0.77-4.66)    | 0.16        |                   | 0.66 (0.27-1.64) | 0.38        |                   |

Abbreviations, BMI: Body mass index; AFP: Alpha-Fetoprotein; HOMA-IR: Homeostasis model of assessment - insulin resistance; BCLC: Barcelona Clinic Liver Cancer. Hazard ratios are not adjusted for other covariates.
